# Supplementary material for: Boosting glucose oxidation by constructing Cu–Cu2O heterostructures
Source: Royal Society of Chemistry journal article supplement (doi:10.1039/d0nj03700a), 2020-01-01
Supplement: d0nj03700a1.pdf [file d0nj03700a1.pdf]

Supporting information for

## Boosting Glucose Oxidation by Constructing Cu-Cu<sub>2</sub>O Heterostructures

*Kangzhe Cao, Hang Zhang, Zihui Gao, Yiyuan Liu, Yongheng Jia, Huiqiao Liu\**

Dr. K. Cao, H. Zhang, Z. Gao, Y. Liu, Y. Jia, Dr. H. Liu  
College of Chemistry and Chemical Engineering, Henan Province Key Laboratory of  
Utilization of Non-Metallic Mineral in the South of Henan, Xinyang Normal  
University, Xinyang 464000, China  
E-mail: liuhq@xynu.edu.cn (H. Liu)

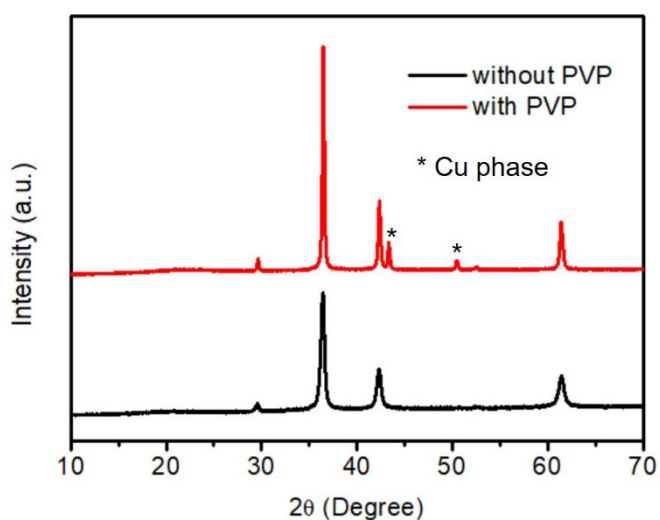

Fig. S1. XRD patterns of the calcinated products of as-prepared Cu<sub>2</sub>O prepared without and with PVP.

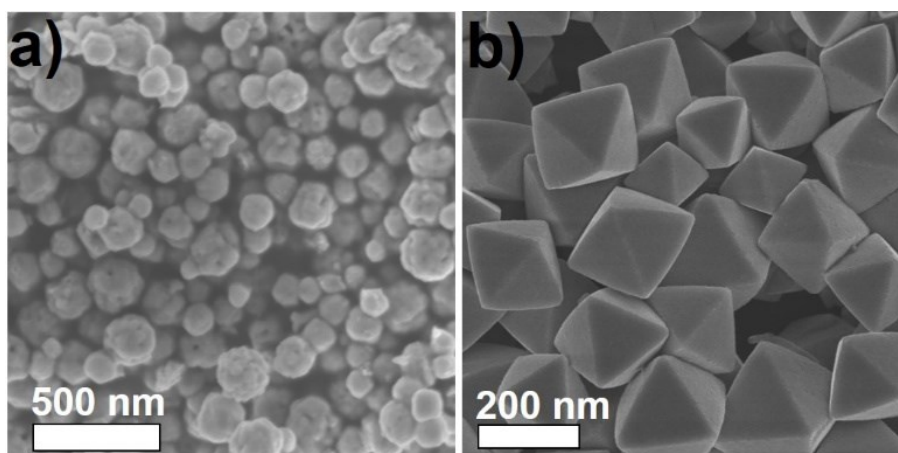

Fig. S2. SEM images of Cu<sub>2</sub>O prepared without (a) and with (b) PVP.

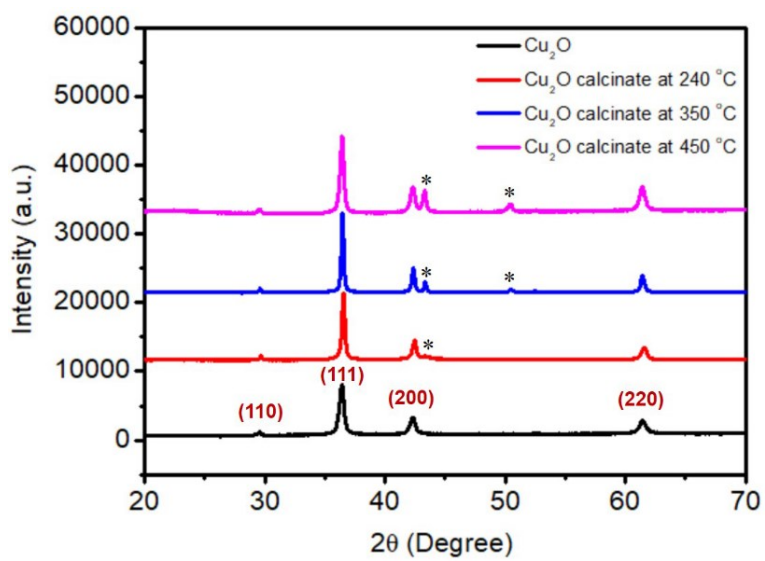

Fig. S3. XRD patterns of as prepared Cu<sub>2</sub>O and calcinated at different temperatures in Ar atmosphere.

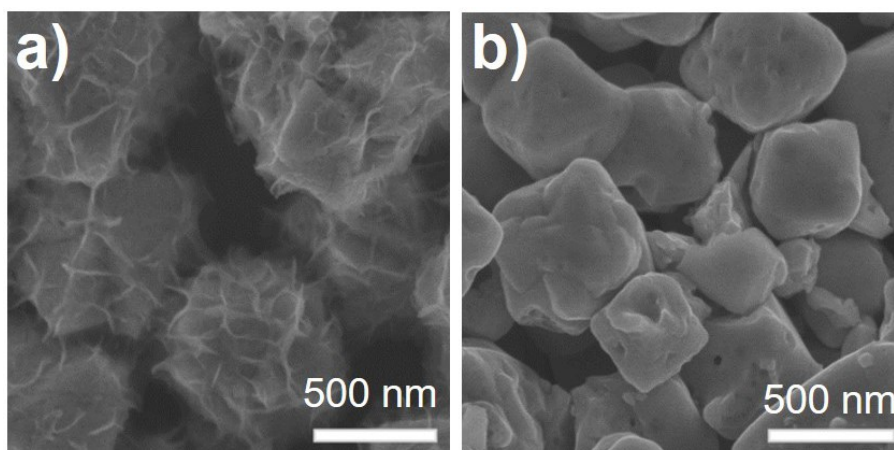

Fig. S4. SEM images of the as prepared Cu<sub>2</sub>O calcinate at (a) 240 °C and (b) 450 °C in the Ar atmosphere.

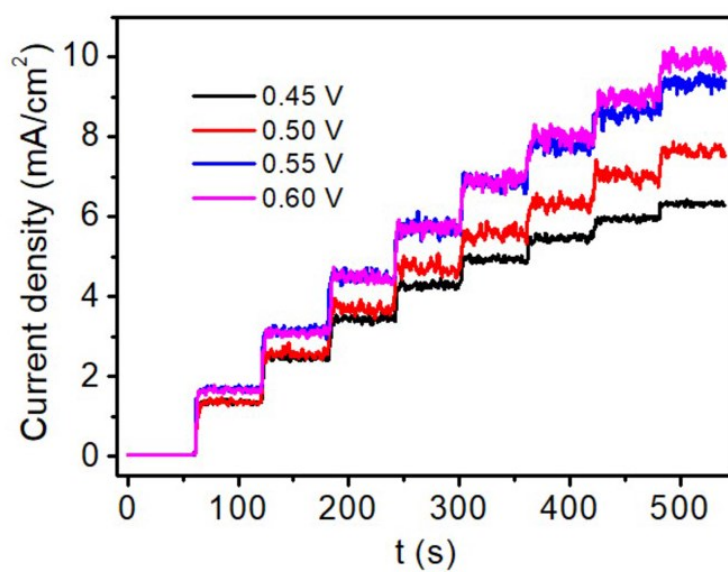

Fig. S5. Amperometric responses of Cu-Cu<sub>2</sub>O/GCE with successive addition of different concentration glucose to the 0.1 M NaOH electrolyte at different voltages.

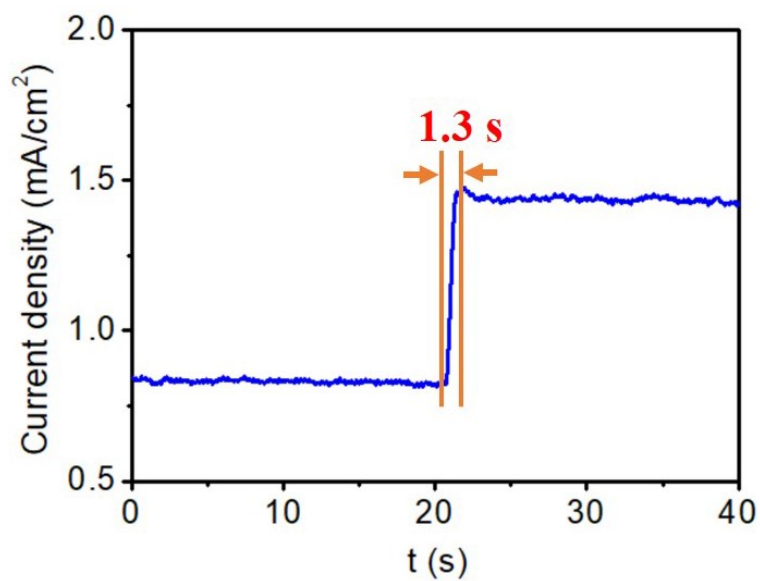

Fig. S6. Amperometric response time of Cu-Cu<sub>2</sub>O/GCE sensor.

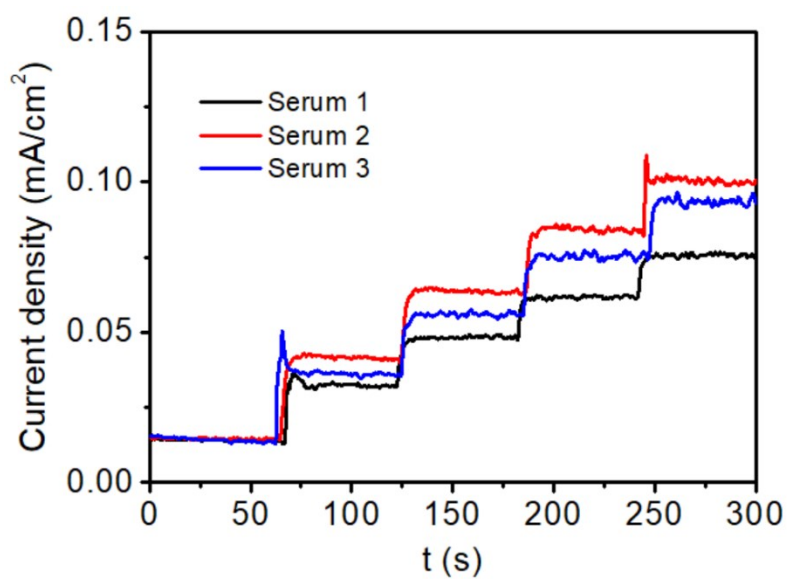

Fig. S7. Amperometric responses of Cu-Cu<sub>2</sub>O/GCE sensor with the successive addition of 100  $\mu$ L of human blood serum samples to 50 mL of 0.1 M NaOH for three different samples.
